# Supplementary material for: Degenerate PCR Primers to Reveal the Diversity of Giant Viruses in Coastal Waters
Source: PubMed Central journal article supplement (PMC6163766; doi:10.3390/v10090496), 2018-09-13
Supplement: viruses-10-00496-s001.pdf [file viruses-10-00496-s001.pdf]

# Degenerate PCR primers to reveal the diversity of giant viruses in coastal waters

Yanze Li<sup>1,\*</sup>, Pascal Hingamp<sup>2,\*</sup>, Hiroyasu Watai<sup>3</sup>, Hisashi Endo<sup>1</sup>, Takashi Yoshida<sup>3</sup>, Hiroyuki Ogata<sup>1,\*</sup>

<sup>1</sup> Bioinformatics Center, Institute for Chemical Research, Kyoto University, Uji 611-0011, Japan

<sup>2</sup> Aix Marseille Université, Université de Toulon, CNRS, IRD, MIO UM 110, 13288, Marseille, France

<sup>3</sup> Graduate School of Agriculture, Kyoto University, Kitashirakawa-Oiwake, Sakyo-ku, Kyoto 606-8502, Japan

\* These authors equally contributed to this study.

\* Correspondence to Hiroyuki Ogata, ogata@kuicr.kyoto-u.ac.jp.

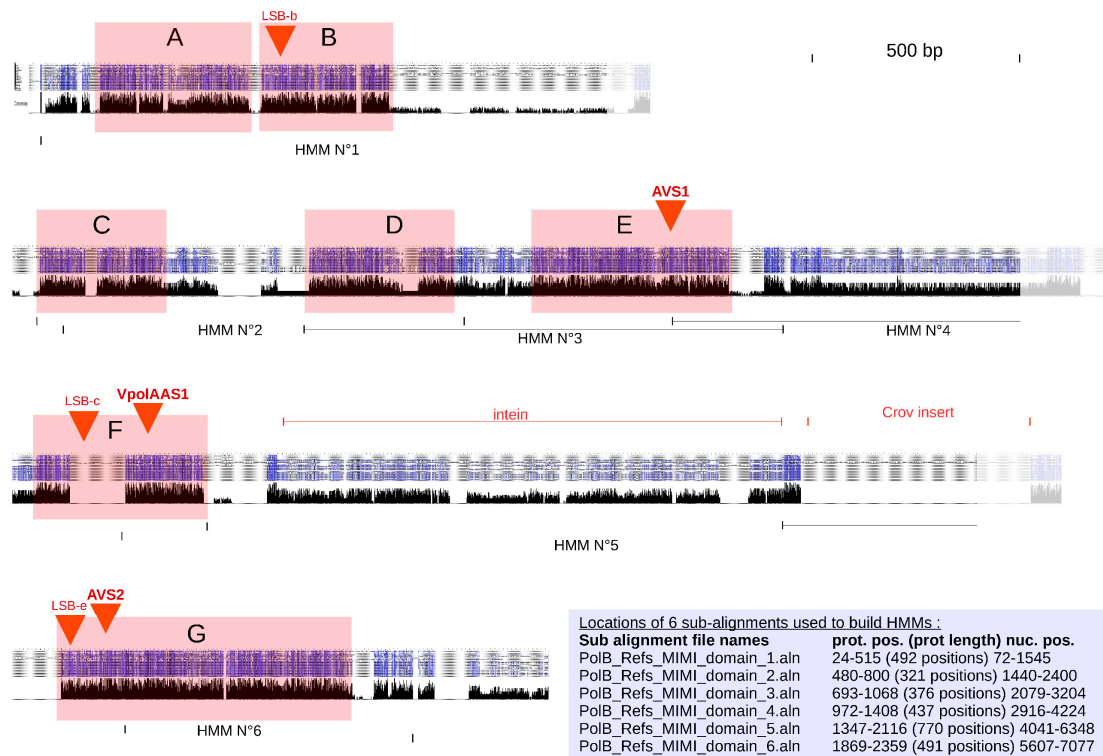

**Figure S1.** Alignment of 17 ‘Megaviridae’ *polB* reference nucleotide sequences (top blue tracks) with consensus agreement (bottom black histograms). The location of seven conserved domains A-G are indicated by pink boxes, while the position of the six sub-alignments used to build HMM1-6 are indicated by black segments. The position of *polB* primers previously used in the literature are indicated by red triangles (Chen et al. 1995, La Scola et al. 2010, Clerissi et al. 2014), whilst the position of the *polB* intein and large CroV INDEL are indicated by red segments.

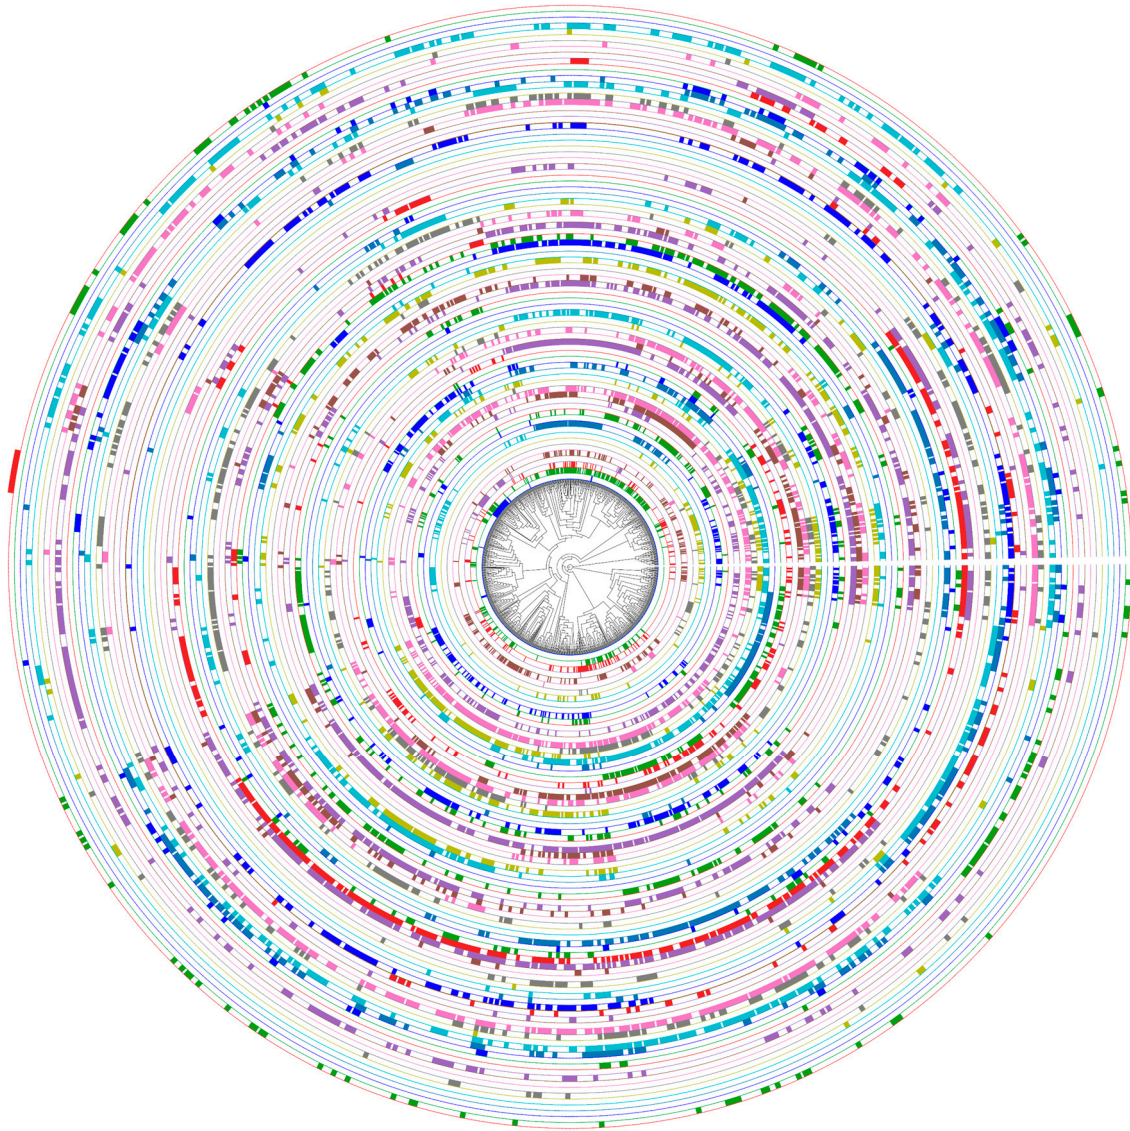

**Figure S2.** *In silico* detection of genomic and metagenomic ‘Megaviridae’ *polBs* by MEGAPRIMER. *In silico* PCR experiments were performed against 21 ‘Megaviridae’ *polBs* (17 references, AaV, BsV, KNV1 and CTV1) and 923 ‘Megaviridae’ *polB* metagenes (921 ‘Megaviridae’-like and 2 OtV-like) from *Tara* Oceans using 82 primer pairs with 10% of maximum mismatches allowed. Rings outside the phylogenetic tree represent primer pairs (PP1 to PP83 from inside to outside). Colored part of the rings indicates positive *in silico* PCR results.

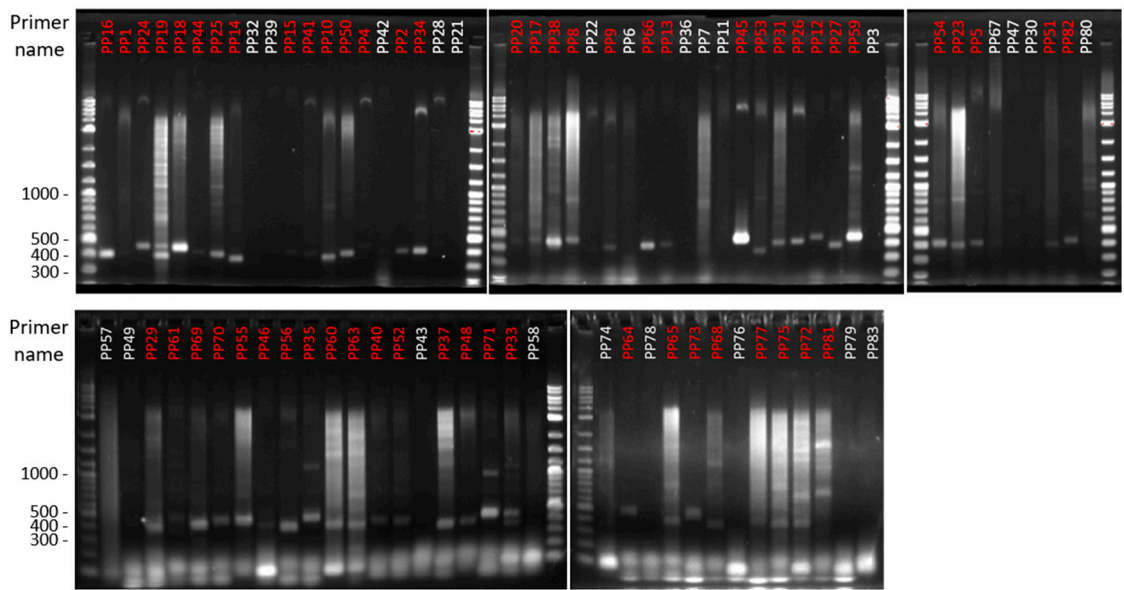

**Figure S3.** Gel electrophoresis of PCR products. PCR products with visible bands (red labels) were sequenced, while others (white labels) were discarded.

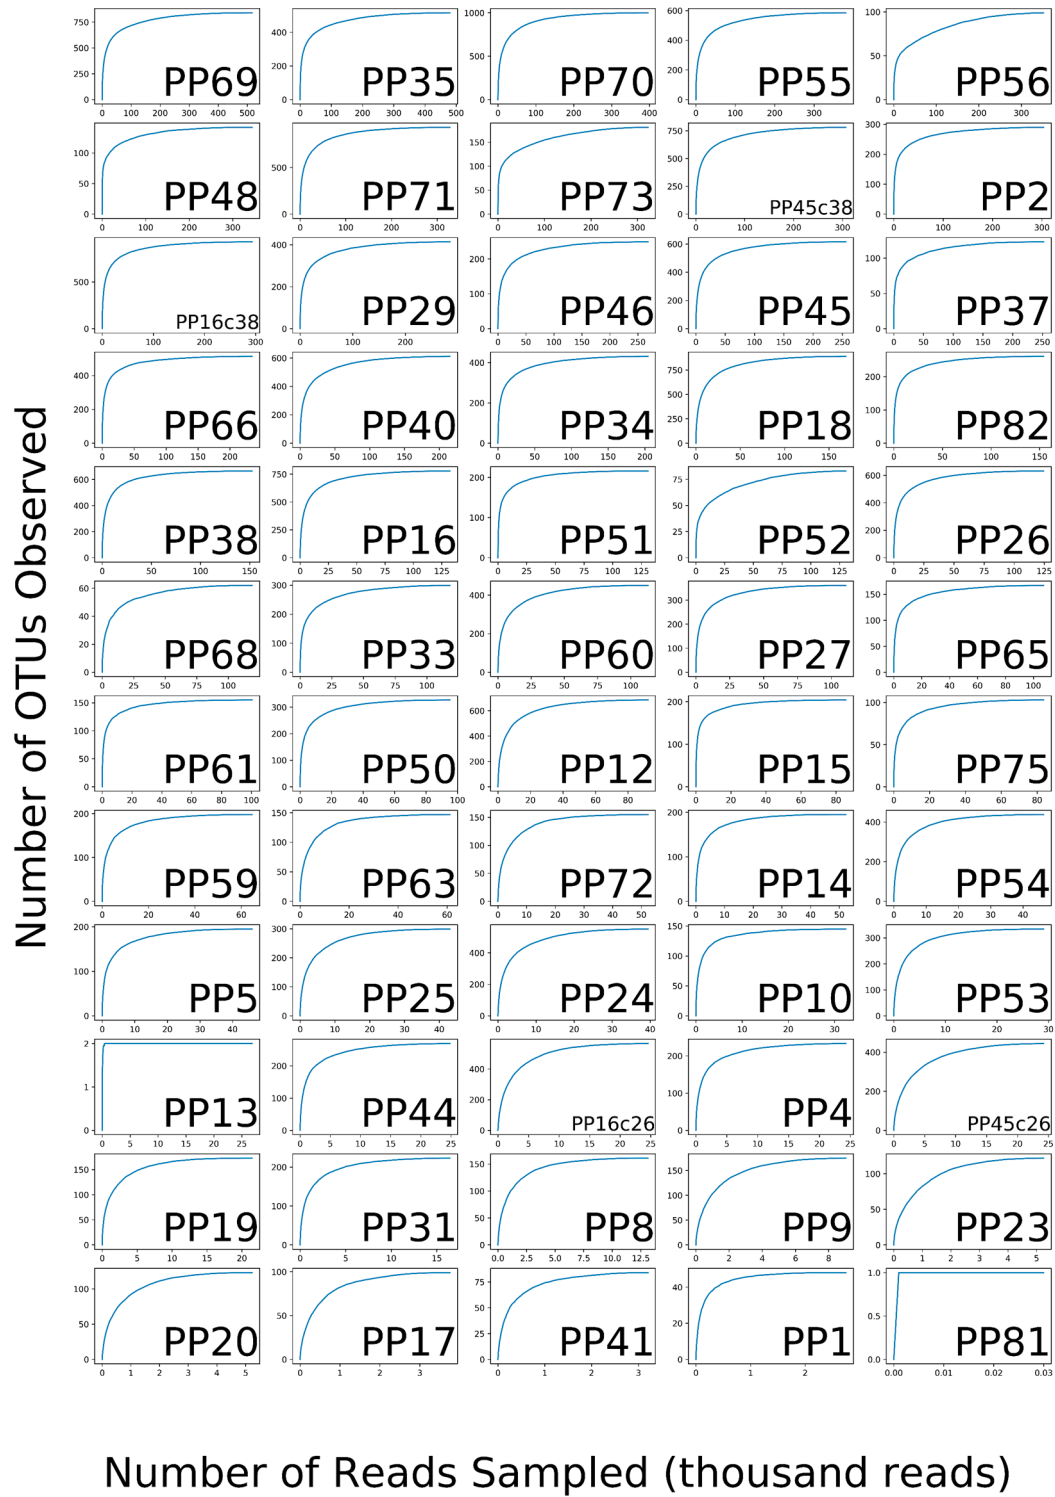

**Figure S4.** Rarefaction curves for individual primer pairs. This figure shows rarefaction curves for 60 samples for which high quality ‘Megaviridae’ *polB* sequences were generated. Sequences are clustered at 97% DNA identity.

**A. All OTUs for PP16**

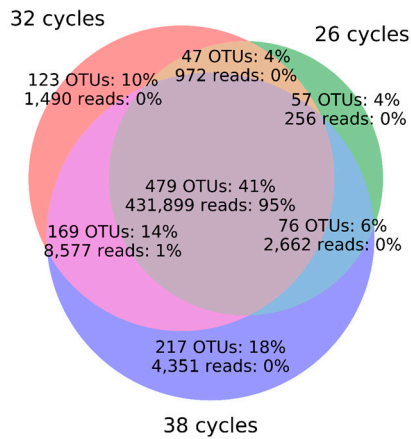

**D. All OTUs for PP45**

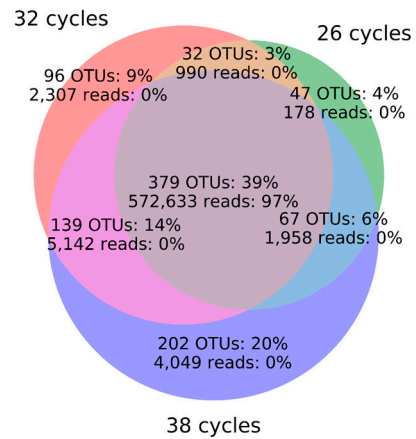

**B. Top 500 OTUs for PP16**

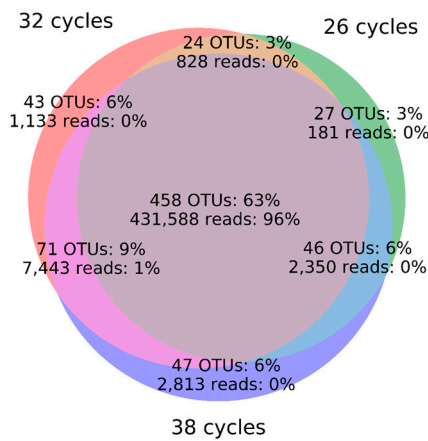

**E. Top 500 OTUs for PP45**

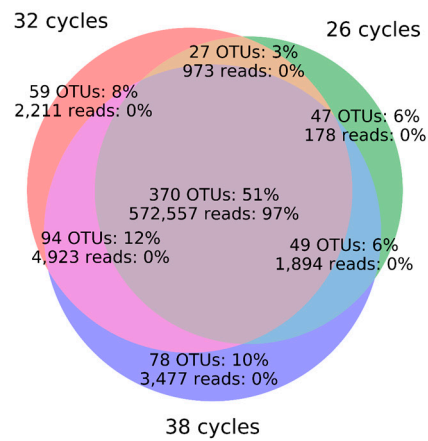

**C. Top 100 OTUs for PP16**

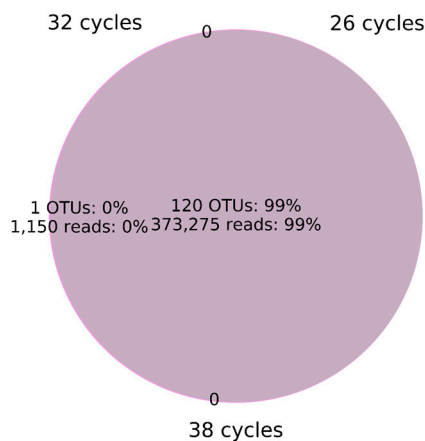

**F. Top 100 OTUs for PP45**

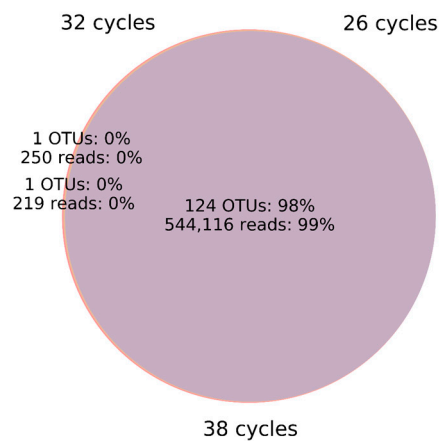

**Figure S5.** Number of OTUs shared by different PCR cycles for PP16 (A, B and C) and PP45 (D, E and F). Venn diagrams correspond to those for all OTUs (A, D), top 500 abundant OTUs (B, E) and top 100 abundant OTUs (C, F). OTUs were generated by grouping at 97% DNA sequence identity.

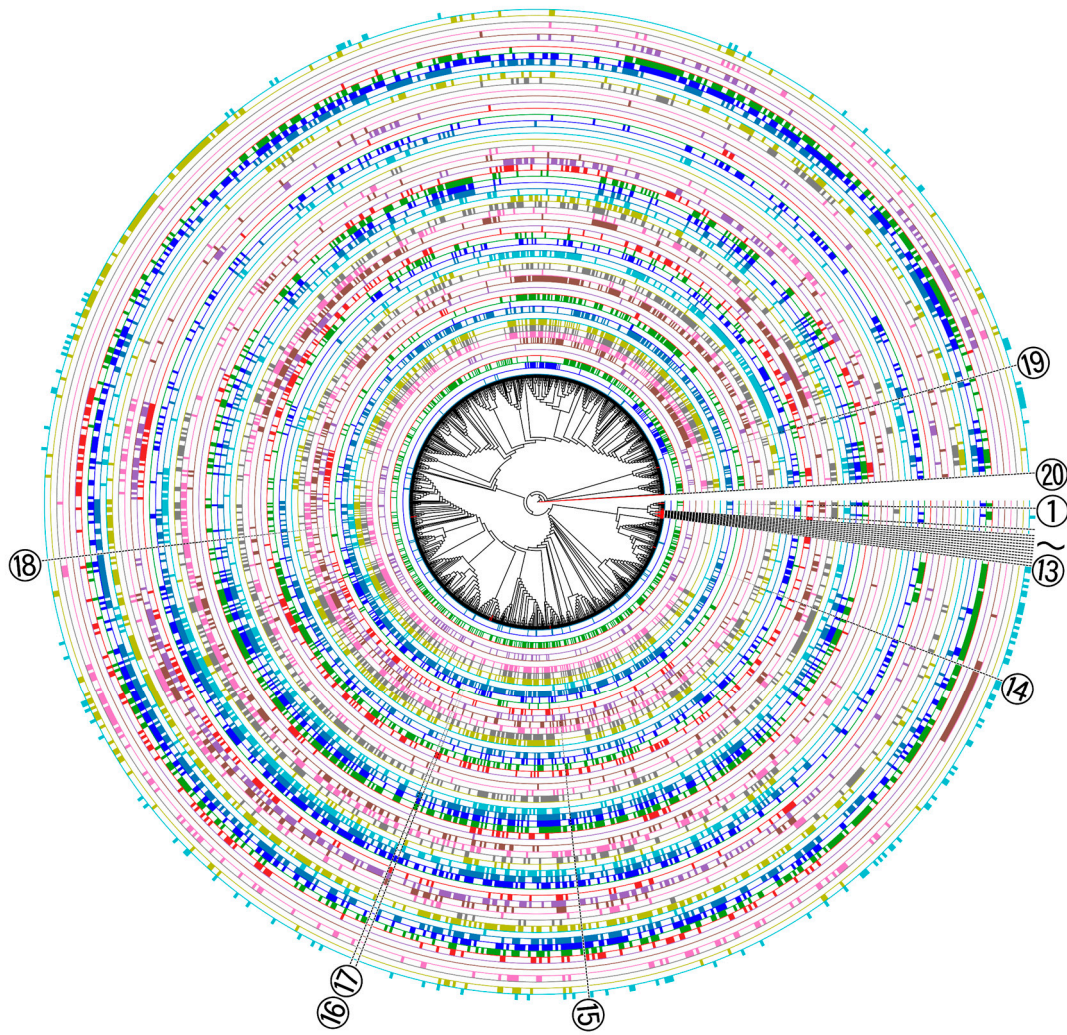

**Figure S6.** Relationships between read acquisition for OTUs and primer pairs. Same phylogenetic tree as in Figure 5 was used in the central part of the figure. Rings outside the phylogenetic tree represent primer pairs (PP1 to PP83 from inside to outside). Colored part of the rings indicates acquisition of reads for the corresponding primer pairs and OTUs (90% amino acid sequence identity). Reference genomic genes are indicated by the corresponding numbers in Figure 5.

**Table S1.** Seventeen reference genome sequences used in primer design

| <b>Virus name</b>                                       | <b>Access number</b> |
|---------------------------------------------------------|----------------------|
| <i>Catovirus</i>                                        | KY684084             |
| <i>Klosneuvirus</i>                                     | KY684109             |
| <i>Aureococcus anophagefferens virus</i> isolate BtV-01 | NC_024697            |
| <i>Bodo saltans virus</i> strain NG1                    | MF782455             |
| Organic Lake phycodnavirus 1                            | HQ704802             |
| Organic Lake phycodnavirus 2                            | HQ704803             |
| <i>Chrysochromulina ericina virus</i> isolate 01        | EU006632             |
| <i>Pyramimonas orientalis virus</i> isolate 01          | EU006633             |
| <i>Hirudovirus</i> strain Sangsue                       | KF493731             |
| <i>Mimivirus</i> Bus strain RTM2                        | JF979178             |
| <i>Megavirus courdo7</i> isolate Mv13-c7                | JN885991             |
| <i>Moumouvirus ochan</i>                                | JQ063130             |
| <i>Moumouvirus monve</i> isolate Mv13-mv                | JN885998             |
| <i>Terra virus</i> 2 TAO-TJA                            | GU265562             |
| <i>Mimivirus pointerouge1</i> strain Pr1                | JF979167             |
| Megavirus lba isolate LBA111                            | NC_020232            |
| <i>Acanthamoeba polyphaga mimivirus</i>                 | NC_014649            |
| <i>Megavirus chiliensis</i>                             | NC_016072            |
| <i>Acanthamoeba polyphaga moumouvirus</i>               | NC_020104            |
| <i>Phaeocystis globosa virus</i> strain 16T             | NC_021312            |
| <i>Cafeteria roenbergensis virus</i> BV-PW1             | NC_014637            |



**Table S2.** Sequences of MEGAPRIMER.

| <b>Name</b> | <b>Forward primer</b>          | <b>Reverse primer</b>      |
|-------------|--------------------------------|----------------------------|
| PP1         | DCGHAARAARGGHTATRTTGG          | WGATTGWGGTTTRTTWCCNGGR     |
| PP2         | WGAATATGARAAAACHTTYTATCC       | MATTCTMTCNGCHARWACTTTATG   |
| PP3         | CCACAYGATYTDGARTATGARAARAC     | WARNAYAWWATGWGCAAT         |
| PP4         | YCCWCATAARYTWGAATAYGARAARAC    | YGATTGDGGYTTATTKCCWGGRY    |
| PP5         | CCACAYGATSYWGARTAYGARAARACATT  | KATCWGCHARHACCTTGTGD       |
| PP6         | RAARCGDTATGTBGGRTATGY          | YTTYGGRTTCTTRTABCCACTNC    |
| PP7         | RTATGARAARACNYTNATGCC          | RTGWCCDATTGCAWNGGR         |
| PP8         | NGCNCAAGAAGCNGGNGAA            | DGCDARWACTTTATGWGCDAT      |
| PP9         | YAARAARMGATATGTDGHAAT          | TTGHGGNGCAYTWCCWGGRTCTC    |
| PP10        | RAARAGRTAYACDGGDGATAAAT        | WGGRTTYCTYTCNGCCATWCKATC   |
| PP11        | VACCACATKAYYTDGAATW            | WATAWAWACAWANGGWAYTCT      |
| PP12        | WCCACAYGAYTAGARTAYGARAARAC     | YTTRGGTTTATTWCCWGSRTCTCTH  |
| PP13        | YAYAAACCDCAAGCWYTWAAATTAYGA    | WGCYAAWACTTTATGTGCWA       |
| PP14        | NAARAARCGWTATGTDGGW            | WCCWATTCTATCDGCTARWAC      |
| PP15        | GATAYACNGGNGAYAAATATGAR        | DGCATANGGDATHCKATCATT      |
| PP16        | RGAATATGARAARACATTY            | WGCYAAACTYATGDGCDAT        |
| PP17        | RGAATAYGARAARACWTTTWKGCC       | HATTCTATCACCWGVDCYWGTT     |
| PP18        | DCAYGAYTTRGARTATGARAARAC       | HGATGGTTTATTNCCNGGRTC      |
| PP19        | RTAYGARAARACVTTYATGCC          | HACTTTRTGNGCDATTTGH        |
| PP20        | RTATGARAARACNYTNATGCC          | GGTTTNGGYTTRTHCCHGGGTC     |
| PP21        | RGMTAYRTTGGWAAYAAATAYGAAW      | KAYRTAWACAWANGGWATTC       |
| PP22        | RTATGARAARACRYTNATGCC          | DATYTGATTNGGATYTRTAATMAC   |
| PP23        | HAARAAAMGRTAYGTWGGWATG         | VGGYTTATTACCDGRRTCGCGY     |
| PP24        | NCARGAYYTDGAATATGAAAARAC       | TCATTKGGTTTNGGTTTRTYWCCHGG |
| PP25        | YGATYTWGARTAYGARAARACATTY      | YAAWACYTTRTYGCDATTTGY      |
| PP26        | NCAAGAYTTRGARTATGARAARAC       | HCCNATTCTATCNGCYAAYAC      |
| PP27        | NAARAARMGATATGTNGGWATG         | GGWTCTCTTTTHSCHATYCTATCHGC |
| PP28        | TATGARAAAACATTYATGCC           | DATAWABACAWAWGGHA          |
| PP29        | RAARMGATATRYVGGAGATAARTATGA    | HCCHGGRTCTCKTTCHGCCATKC    |
| PP30        | AAAAACGWATAACKGGMMTRTTRTATGAAK | WGCRAAGACTYATGTGSRATW      |
| PP31        | YTGAARAARCCWCAYGATYTRGAR       | YARYACTTTATGNGCDATY        |
| PP32        | RATATGTHGGWAATYTDATGAR         | HARNACTTTATGWGCWATY        |
| PP33        | YCCWCAWRATTTAGARTATGAAAAA      | KCATTRCCDGGRYTCTTKCTTT     |
| PP34        | WCCWCAYGAYTTRGARTAYGAAAARAC    | GCHARNACCTTRTGHGCAAT       |
| PP35        | YTGARTATGARAARACATTY           | WAYACRWAYGGAATTCTATC       |
| PP36        | WCATGAYYTRGARTATGARAARAC       | RAADGGDATHCKATCTCC         |
| PP37        | DCCATTTATCYTKTTYTCAAARAAR      | DACYTTATGWGCWATCTGRTCHGGA  |
| PP38        | DGARTATGARAARACRTTYTGCC        | WGGYTTATTWCCWGGDTCTCTTTY   |
| PP39        | WAARAARAGRTATGTNGGN            | DGTTTGWATATAHAYRAAHGG      |
| PP40        | TTCCWCAYGATYTDGAATATGARAARAC   | RATYCTWTCTGCIYARDACWAC     |
| PP41        | DGGTGADAARYATGAAH              | DGGWATWCKATCATTGVTTHHGTT   |
| PP42        | WTTAGARTATGARAARACRTTYTRKCC    | MATTCTRTCYGCYAAWACYTTRTGW  |
| PP43        | MGDTATKTTGGWAATAAATATGAA       | TCAATAWAWMMATAWGGWAYTCTRCA |
| PP44        | RCAYGATYTDGARTATGARAARAC       | VATYCTATCTGCHARNAC         |
| PP45        | SCACCDCAYGATTTTGAATATGARAA     | WGGTTTATTWCCCHGGGTC        |

|      |                              |                              |
|------|------------------------------|------------------------------|
| PP46 | DCCWCAYGATYTRGARTATGARAAAACA | HACYTTATGWGCWATACTYTCRGGGA   |
| PP47 | WAARAARARRTAYGTKGGAAAY       | WGGKKYAKWWCCAGGRTCTC         |
| PP48 | YATTTTAYCCWTTYATTCTWATWTCT   | KATCRGCTAAYACYTTRTGKGCWATM   |
| PP49 | WAARAARMGATAYGTAGGWRAY       | RAAWGGDATYCTRTCATTWAY        |
| PP50 | NCAYGATYTDGAATATGARAARAC     | HACTTTRTGNGCDATTTGM          |
| PP51 | MGATATGTKGGWAWKYTATATGAA     | KCTSGGTYATTKCCWGRATC         |
| PP52 | YGTGGAATGTTRTATGAASAM        | WAYAWAARCAWATGSWATKC         |
| PP53 | WAARAARMGRTATGTWGGHATG       | GCHARHACTTTRTGHGCAATM        |
| PP54 | KCCRCAYGAYTTGGARTAYGARAA     | BGCCAAWACYTTRTGHGCDAT        |
| PP55 | WCCRCAYGAYTTRGARTATGAAAARAC  | WAGGCTTRTKCCVGGATC           |
| PP56 | ATCCRTTTGYATTTAAGTAARAARMGW  | TCATTCTRTCWGCTAAACAWACRTGWGC |
| PP57 | NGCAMARGAAGCNGGYSA           | RCAWAWGGWATTCKATCNCC         |
| PP58 | RTATGTRGGDATGTTRTATGAG       | YAWAYGCAATMCGRTCYCC          |
| PP59 | RGAATATGARAAAACNYTDATGCC     | HCCHGGYTTYGGYTATTTCWGG       |
| PP60 | BAARAAGMGWTAYGTRGGWATG       | YTTNGGYTTRTKCCHGGGTCTC       |
| PP61 | DGARTAYGARAAAACATTTWTRCC     | RATATAWACAWAVGGDATWC         |
| PP63 | RGAATATGARAARACRYTBATGCC     | RTGDCKATTTGYTGWGGATTY        |
| PP64 | TCCACAYGATYTAGARTATGARAARAC  | YAWAWACATATGGAATTCT          |
| PP65 | AGAATATGARAAAACWTTYATCC      | TTCTATCTGCYAATACWGCRTHGCT    |
| PP66 | WCCWCATGATTTTRGARTATGAAAAA   | WGCHARNACTTTRTGTGCWAT        |
| PP67 | WCAYGATYTDGAATAYGAAAARAC     | RCWARARCADYATGAGCWAT         |
| PP68 | YGTAGGAATKCTWTATGAGSAK       | YGGWTTBGGTTATTYCCYGGW        |
| PP69 | WCCWCATGATTTTRGAATATGARAA    | WGCTARWACHTTATGRGCAATB       |
| PP70 | WCAHGWYTAGAATATGARAAAAC      | GGTTTATTWCCVGRATCHCKTTYACC   |
| PP71 | TCCWCAHGAYTTAGARTATGARAARAC  | WGGWGCAYTWCCWKGATCTCTY       |
| PP72 | AAAARCGMATGTYGGWATGY         | MCCWGGYWTGGGTTTATRCC         |
| PP73 | RARCATTSTATWMAATGTGGR        | HGCVATACYYTKTGATTTTATAAWAT   |
| PP74 | WAARAARMGATATGTWGGDMAT       | KATCWGCYAAWACMKYATGWGC       |
| PP75 | RGAATATGARAARACWTWYTGCC      | RACWACRTGASCWATTCKMSTCCAATC  |
| PP76 | RAGRTATRTGGWAAYAAATATGAR     | YGATTKWGGTTRTTWCCTGGR        |
| PP77 | DCCACAYSAYTTRGARTATGARAA     | BATVCGRTYCGCCAAYAC           |
| PP78 | KTATGARAAGRYATWWTWCCATTT     | MAGCWARYAYWWYATGAGC          |
| PP79 | RAGATAYRYWGGTWWAAATATGAA     | KTWGGWKYATTWCCTGGATC         |
| PP80 | CTTTACCCGTGCTTATTTTC         | GTGGTTGATTTTCAGGTG           |
| PP81 | WCCWCATRAACTCGAATATGA        | YGCTAARRCKKYATGACCTATYTG     |
| PP82 | WCCWCATAAAYTRGARTATGAAAAR    | SCCATWCKRTCHGCTAATAYTTTATGW  |
| PP83 | CAAAATGTWCCHAAACCRCARAGT     | ACTTTATGRGCAATWGTGATGGTT     |

PP62 was not specific to 'Megaviridae' and thus excluded (see Materials and Methods for detail).

**Table S3.** *In silico* detection of ‘Megaviridae’ *polB* by MEGAPRIMER.

| Name | Viruses included in the design of primers |      |          |       |          |     |      |                      |               |                   |                  |                   |                   |              | Viruses not included in the design of primers |                      |               |     |     |      |      |  |
|------|-------------------------------------------|------|----------|-------|----------|-----|------|----------------------|---------------|-------------------|------------------|-------------------|-------------------|--------------|-----------------------------------------------|----------------------|---------------|-----|-----|------|------|--|
|      | CeV                                       | CroV | OLPV1    | OLPV2 | PgV      | PoV | APMV | hirudovirus_Sangstue | megavirus_bus | megavirus_courdo7 | moumouvirus_M10A | moumouvirus_monve | moumouvirus_ochan | pointerougel | terra2                                        | megavirus_chiliensis | megavirus_lba | AaV | BsV | KNV1 | CTV1 |  |
| PP1  |                                           |      |          |       |          |     |      |                      |               |                   |                  |                   |                   |              |                                               |                      |               |     |     |      |      |  |
| PP2  |                                           |      |          |       |          |     |      | x                    | x             |                   |                  |                   |                   |              |                                               | x                    | x             | x   |     |      |      |  |
| PP3  |                                           | x    |          |       |          |     |      |                      |               |                   |                  |                   |                   |              |                                               |                      |               |     |     |      |      |  |
| PP4  |                                           | x    |          |       |          |     |      |                      |               |                   |                  |                   |                   |              |                                               |                      |               |     |     |      |      |  |
| PP5  |                                           |      |          |       | x        | x   |      |                      |               |                   |                  |                   |                   |              |                                               |                      |               |     |     |      |      |  |
| PP6  |                                           |      |          |       |          |     |      |                      |               |                   |                  |                   |                   |              |                                               |                      |               |     |     |      |      |  |
| PP7  |                                           |      |          |       |          |     |      |                      |               |                   |                  |                   |                   |              |                                               |                      |               |     |     |      |      |  |
| PP8  |                                           |      |          |       |          |     |      |                      |               |                   |                  |                   |                   |              |                                               |                      |               |     |     |      |      |  |
| PP9  |                                           | x    |          |       |          |     |      |                      |               |                   |                  |                   |                   |              |                                               |                      |               |     |     |      |      |  |
| PP10 |                                           |      |          |       |          |     |      |                      |               |                   |                  |                   |                   |              |                                               |                      |               |     |     |      |      |  |
| PP11 |                                           |      |          |       |          |     |      |                      |               |                   |                  |                   |                   |              |                                               |                      |               |     |     |      |      |  |
| PP12 | x                                         | x    |          |       |          |     |      |                      |               |                   |                  |                   |                   |              |                                               |                      |               |     |     |      |      |  |
| PP13 |                                           |      |          |       |          |     |      |                      |               |                   |                  |                   |                   |              |                                               |                      |               |     |     |      |      |  |
| PP14 |                                           |      |          |       |          |     |      |                      |               |                   |                  |                   |                   |              |                                               |                      |               |     |     |      |      |  |
| PP15 |                                           |      |          |       |          |     |      |                      |               |                   |                  |                   |                   |              |                                               |                      |               |     |     |      |      |  |
| PP16 | x                                         |      | x        |       |          |     |      |                      |               |                   |                  |                   |                   |              |                                               |                      |               |     |     |      |      |  |
| PP17 | x                                         |      |          |       |          |     |      |                      |               |                   |                  |                   |                   |              |                                               |                      |               |     |     |      |      |  |
| PP18 |                                           | x    |          | x     |          |     |      |                      |               |                   |                  |                   |                   |              |                                               |                      |               |     |     |      |      |  |
| PP19 | x                                         |      |          |       | x        |     |      |                      |               |                   |                  |                   |                   |              |                                               |                      |               |     |     |      |      |  |
| PP20 | x                                         |      |          | x     |          |     |      |                      |               |                   |                  |                   |                   |              |                                               |                      |               |     |     |      |      |  |
| PP21 |                                           |      |          |       |          |     |      |                      |               |                   |                  |                   |                   |              |                                               |                      |               |     |     |      |      |  |
| PP22 |                                           |      |          |       | x        |     |      |                      |               |                   |                  |                   |                   |              |                                               |                      |               |     |     |      |      |  |
| PP23 | x                                         |      |          |       |          |     |      |                      |               |                   |                  |                   |                   |              |                                               |                      |               |     |     |      |      |  |
| PP24 | x                                         |      |          |       |          |     |      |                      |               |                   |                  |                   |                   |              |                                               |                      |               |     |     |      |      |  |
| PP25 | x                                         |      |          |       | <b>X</b> |     |      |                      |               |                   |                  |                   |                   |              |                                               |                      |               |     |     |      |      |  |
| PP26 |                                           |      |          |       | x        |     |      |                      |               |                   |                  |                   |                   |              |                                               |                      |               |     |     |      |      |  |
| PP27 |                                           |      |          |       |          |     |      |                      |               |                   |                  |                   |                   |              |                                               |                      |               |     |     |      |      |  |
| PP28 |                                           |      | <b>X</b> | x     |          |     |      |                      |               |                   |                  |                   |                   |              |                                               |                      |               | x   |     |      |      |  |
| PP29 |                                           | x    |          |       |          |     |      |                      |               |                   |                  |                   |                   |              |                                               |                      |               |     |     |      |      |  |
| PP30 |                                           |      |          |       |          |     |      |                      |               |                   |                  |                   |                   |              |                                               |                      |               |     |     |      |      |  |
| PP31 |                                           |      |          |       |          |     |      |                      |               |                   |                  |                   |                   |              |                                               |                      |               |     |     |      |      |  |
| PP32 |                                           |      |          |       |          |     |      |                      |               |                   |                  |                   |                   |              |                                               |                      |               |     |     |      |      |  |
| PP33 |                                           |      |          |       |          |     |      |                      |               |                   |                  |                   |                   |              |                                               |                      |               |     |     |      |      |  |
| PP34 | x                                         |      |          |       | x        | x   |      |                      |               |                   |                  |                   |                   |              |                                               |                      |               |     |     |      |      |  |
| PP35 |                                           |      |          | x     |          |     |      |                      |               |                   |                  |                   |                   |              |                                               |                      |               | x   |     |      |      |  |
| PP36 |                                           |      |          | x     |          |     |      |                      |               |                   |                  |                   |                   |              |                                               |                      |               |     |     |      |      |  |
| PP37 |                                           |      |          |       |          |     |      |                      |               |                   |                  |                   |                   |              |                                               |                      |               |     |     |      |      |  |



**Table S4.** Number of genotypes of ‘Megaviridae’ from *Tara* Oceans metagenomic data.

| Station | Depth | Size Fraction (µm) | Number of Genotypes |
|---------|-------|--------------------|---------------------|
| 4       | DCM   | 0.2-1.6            | 53                  |
| 4       | SUR   | 0.2-1.6            | 29                  |
| 7       | DCM   | 0.2-1.6            | 35                  |
| 7       | SUR   | 0.2-1.6            | 20                  |
| 9       | DCM   | 0.2-1.6            | 31                  |
| 9       | SUR   | 0.2-1.6            | 58                  |
| 18      | DCM   | 0-0.2              | 5                   |
| 18      | DCM   | 0.2-1.6            | 18                  |
| 18      | SUR   | 0.2-1.6            | 16                  |
| 18      | SUR   | 0-0.2              | 4                   |
| 22      | SUR   | 0-0.2              | 5                   |
| 23      | DCM   | 0.2-1.6            | 7                   |
| 23      | DCM   | 0-0.2              | 6                   |
| 23      | SUR   | 0.2-1.6            | 3                   |
| 25      | DCM   | 0-0.2              | 5                   |
| 25      | DCM   | 0.2-1.6            | 26                  |
| 25      | SUR   | 0.2-1.6            | 37                  |
| 25      | SUR   | 0-0.2              | 4                   |
| 30      | DCM   | 0.2-1.6            | 25                  |
| 30      | DCM   | 0-0.2              | 4                   |
| 30      | SUR   | 0.2-1.6            | 73                  |
| 31      | SUR   | 0-0.2              | 2                   |
| 31      | SUR   | 0.2-1.6            | 18                  |
| 32      | DCM   | 0-0.2              | 0                   |
| 32      | DCM   | 0.2-1.6            | 22                  |
| 32      | SUR   | 0-0.2              | 6                   |
| 32      | SUR   | 0.2-1.6            | 28                  |
| 33      | SUR   | 0.2-1.6            | 12                  |
| 34      | DCM   | 0-0.2              | 10                  |
| 34      | DCM   | 0.2-1.6            | 36                  |
| 34      | SUR   | 0.1-0.2            | 32                  |
| 34      | SUR   | 0-0.2              | 12                  |
| 34      | SUR   | 0.2-1.6            | 17                  |
| 36      | DCM   | 0-0.2              | 2                   |
| 36      | DCM   | 0.2-1.6            | 54                  |
| 36      | SUR   | 0-0.2              | 0                   |
| 36      | SUR   | 0.2-1.6            | 36                  |
| 36      | SUR   | 0.1-0.2            | 3                   |
| 37      | OMZ   | 0.2-1.6            | 30                  |
| 37      | OMZ   | 0.1-0.2            | 76                  |
| 38      | DCM   | 0-0.2              | 10                  |
| 38      | DCM   | 0.2-1.6            | 47                  |
| 38      | OMZ   | 0.1-0.2            | 8                   |
| 38      | OMZ   | 0.2-1.6            | 9                   |
| 38      | SUR   | 0.1-0.2            | 2                   |

|    |     |          |    |
|----|-----|----------|----|
| 38 | SUR | 0-0.2    | 3  |
| 38 | SUR | 0.2-1.6  | 32 |
| 39 | DCM | 0-0.2    | 9  |
| 39 | DCM | 0.2-1.6  | 27 |
| 39 | OMZ | 0.2-1.6  | 16 |
| 39 | OMZ | 0.1-0.2  | 33 |
| 39 | SUR | 0-0.2    | 9  |
| 39 | SUR | 0.1-0.2  | 2  |
| 41 | DCM | 0-0.2    | 18 |
| 41 | DCM | 0.2-1.6  | 58 |
| 41 | SUR | 0.1-0.2  | 1  |
| 41 | SUR | 0.2-1.6  | 20 |
| 41 | SUR | 0-0.2    | 4  |
| 42 | DCM | 0.2-1.6  | 35 |
| 42 | DCM | 0-0.2    | 17 |
| 42 | SUR | 0.2-1.6  | 26 |
| 42 | SUR | 0-0.2    | 8  |
| 45 | SUR | 0.2-1.6  | 14 |
| 46 | SUR | 0-0.2    | 9  |
| 48 | SUR | 0.1-0.2  | 6  |
| 48 | SUR | 0.2-1.6  | 17 |
| 52 | DCM | 0.2-1.6  | 28 |
| 52 | DCM | 0-0.2    | 12 |
| 52 | SUR | 0.2-1.6  | 8  |
| 56 | MES | 0.2-3    | 6  |
| 56 | SUR | 0.2-3    | 12 |
| 57 | SUR | 0.2-3    | 15 |
| 58 | DCM | 0.2-3    | 44 |
| 62 | SUR | 0.2-3    | 12 |
| 64 | DCM | 0.1-0.2  | 12 |
| 64 | DCM | 0-0.2    | 7  |
| 64 | DCM | 0.2-3    | 52 |
| 64 | MES | 0.2-3    | 1  |
| 64 | SUR | 0-0.2    | 10 |
| 64 | SUR | 0.2-3    | 55 |
| 65 | DCM | 0.2-3    | 38 |
| 65 | DCM | 0.1-0.2  | 30 |
| 65 | DCM | 0-0.2    | 14 |
| 65 | MES | 0.2-3    | 4  |
| 65 | SUR | 0-0.2    | 13 |
| 65 | SUR | 0.1-0.2  | 29 |
| 65 | SUR | 0.2-3    | 35 |
| 66 | DCM | 0.2-3    | 34 |
| 66 | DCM | 0-0.2    | 8  |
| 66 | SUR | 0-0.2    | 9  |
| 66 | SUR | 0.2-3    | 58 |
| 67 | SUR | 0.45-0.8 | 93 |

|    |     |          |     |
|----|-----|----------|-----|
| 67 | SUR | 0.2-0.45 | 289 |
| 67 | SUR | 0-0.2    | 9   |
| 67 | SUR | 0.2-3    | 67  |
| 68 | DCM | 0.2-0.45 | 36  |
| 68 | DCM | 0.45-0.8 | 30  |
| 68 | DCM | 0.2-3    | 27  |
| 68 | DCM | 0-0.2    | 9   |
| 68 | MES | 0.45-0.8 | 8   |
| 68 | MES | 0.2-3    | 6   |
| 68 | SUR | 0.45-0.8 | 36  |
| 68 | SUR | 0.2-3    | 30  |
| 68 | SUR | 0-0.2    | 7   |
| 68 | SUR | 0.2-0.45 | 51  |
| 70 | MES | 0.2-3    | 1   |
| 70 | MES | 0.45-0.8 | 7   |
| 70 | MES | 0-0.2    | 0   |
| 70 | MES | 0.2-0.45 | 8   |
| 70 | SUR | 0.2-0.45 | 44  |
| 70 | SUR | 0.2-3    | 15  |
| 70 | SUR | 0.45-0.8 | 30  |
| 70 | SUR | 0-0.2    | 6   |
| 72 | DCM | 0-0.2    | 3   |
| 72 | DCM | 0.2-3    | 41  |
| 72 | MES | 0.2-3    | 7   |
| 72 | MES | 0-0.2    | 1   |
| 72 | SUR | 0.2-3    | 41  |
| 72 | SUR | 0-0.2    | 2   |
| 76 | DCM | 0.2-0.45 | 45  |
| 76 | DCM | 0.2-3    | 20  |
| 76 | DCM | 0-0.2    | 1   |
| 76 | DCM | 0.45-0.8 | 17  |
| 76 | MES | 0.45-0.8 | 3   |
| 76 | MES | 0.2-3    | 1   |
| 76 | SUR | 0.2-3    | 11  |
| 76 | SUR | 0-0.2    | 2   |
| 76 | SUR | 0.2-0.45 | 67  |
| 76 | SUR | 0.45-0.8 | 19  |
| 78 | DCM | 0.2-3    | 19  |
| 78 | DCM | 0.2-0.45 | 55  |
| 78 | DCM | 0.45-0.8 | 21  |
| 78 | MES | 0.2-3    | 2   |
| 78 | MES | 0.45-0.8 | 1   |
| 78 | SUR | 0.2-0.45 | 62  |
| 78 | SUR | 0.2-3    | 30  |
| 78 | SUR | 0-0.2    | 1   |
| 78 | SUR | 0.45-0.8 | 18  |
| 82 | DCM | 0.2-3    | 37  |

|     |     |          |     |
|-----|-----|----------|-----|
| 82  | DCM | 0-0.2    | 1   |
| 82  | SUR | 0.2-3    | 26  |
| 84  | SUR | 0.2-3    | 24  |
| 85  | DCM | 0-0.2    | 2   |
| 85  | DCM | 0.2-3    | 30  |
| 85  | MES | 0.2-3    | 8   |
| 85  | SUR | 0.2-3    | 14  |
| 93  | DCM | 0.2-3    | 28  |
| 93  | SUR | 0.2-3    | 33  |
| 94  | SUR | 0.2-3    | 47  |
| 96  | SUR | 0.2-3    | 16  |
| 98  | DCM | 0.2-3    | 11  |
| 98  | MES | 0.2-3    | 5   |
| 98  | SUR | 0.2-3    | 14  |
| 99  | SUR | 0.2-3    | 21  |
| 100 | DCM | 0.2-3    | 18  |
| 100 | MES | 0.2-3    | 14  |
| 100 | SUR | 0.2-3    | 39  |
| 102 | DCM | 0.2-3    | 118 |
| 102 | MES | 0.2-3    | 6   |
| 102 | SUR | 0.2-3    | 65  |
| 109 | DCM | 0.2-3    | 37  |
| 109 | DCM | 0-0.2    | 14  |
| 109 | MES | 0.2-3    | 6   |
| 109 | SUR | 0.2-3    | 38  |
| 109 | SUR | 0-0.2    | 8   |
| 110 | DCM | 0.2-3    | 38  |
| 110 | MES | 0.2-3    | 13  |
| 110 | SUR | 0.2-3    | 22  |
| 111 | DCM | 0.2-3    | 25  |
| 111 | MES | 0.2-3    | 5   |
| 111 | SUR | 0.2-3    | 36  |
| 112 | DCM | 0.2-3    | 23  |
| 112 | MES | 0.2-3    | 5   |
| 112 | SUR | 0.2-3    | 22  |
| 122 | DCM | 0.2-0.45 | 56  |
| 122 | DCM | 0.2-3    | 41  |
| 122 | DCM | 0.45-0.8 | 16  |
| 122 | DCM | 0.1-0.2  | 11  |
| 122 | MES | 0.1-0.2  | 2   |
| 122 | MES | 0.2-0.45 | 4   |
| 122 | MES | 0.2-3    | 9   |
| 122 | MES | 0.45-0.8 | 2   |
| 122 | SUR | 0.2-3    | 27  |
| 122 | SUR | 0.45-0.8 | 17  |
| 122 | SUR | 0.2-0.45 | 28  |
| 122 | SUR | 0.1-0.2  | 12  |



|     |     |          |     |
|-----|-----|----------|-----|
| 123 | DCM | 0.45-0.8 | 6   |
| 123 | DCM | 0.1-0.2  | 16  |
| 123 | DCM | 0.2-0.45 | 25  |
| 123 | DCM | 0.2-3    | 37  |
| 123 | SUR | 0.45-0.8 | 32  |
| 123 | SUR | 0.2-3    | 43  |
| 123 | SUR | 0.2-0.45 | 41  |
| 124 | DCM | 0.45-0.8 | 15  |
| 124 | DCM | 0.2-3    | 30  |
| 124 | DCM | 0.1-0.2  | 18  |
| 124 | DCM | 0.2-0.45 | 33  |
| 124 | SUR | 0.45-0.8 | 11  |
| 124 | SUR | 0.2-0.45 | 26  |
| 124 | SUR | 0.1-0.2  | 13  |
| 124 | SUR | 0.2-3    | 83  |
| 125 | DCM | 0.1-0.2  | 16  |
| 125 | DCM | 0.45-0.8 | 23  |
| 125 | DCM | 0.2-3    | 38  |
| 125 | DCM | 0.2-0.45 | 62  |
| 125 | SUR | 0.2-3    | 28  |
| 125 | SUR | 0.1-0.2  | 20  |
| 125 | SUR | 0.2-0.45 | 38  |
| 125 | SUR | 0.45-0.8 | 18  |
| 128 | DCM | 0.2-3    | 16  |
| 128 | SUR | 0.2-3    | 16  |
| 132 | DCM | 0.2-3    | 40  |
| 132 | MES | 0.2-3    | 4   |
| 132 | SUR | 0.2-3    | 25  |
| 133 | DCM | 0.2-3    | 132 |
| 133 | MES | 0.2-3    | 10  |
| 133 | SUR | 0.2-3    | 114 |
| 137 | DCM | 0.2-3    | 24  |
| 137 | MES | 0.2-3    | 23  |
| 137 | SUR | 0.2-3    | 50  |
| 138 | DCM | 0.2-3    | 45  |
| 138 | MES | 0.2-3    | 19  |
| 138 | SUR | 0.2-3    | 20  |
| 140 | SUR | 0.2-3    | 36  |
| 141 | SUR | 0.2-3    | 4   |
| 142 | DCM | 0.2-3    | 18  |
| 142 | MES | 0.2-3    | 6   |
| 142 | SUR | 0.2-3    | 31  |
| 145 | MES | 0.2-3    | 7   |
| 145 | SUR | 0.2-3    | 64  |
| 146 | MES | 0.2-3    | 2   |
| 146 | SUR | 0.2-3    | 39  |
| 148 | MES | 0.2-3    | 15  |

|     |     |       |    |
|-----|-----|-------|----|
| 148 | SUR | 0.2-3 | 29 |
| 149 | MES | 0.2-3 | 1  |
| 149 | SUR | 0.2-3 | 64 |
| 150 | DCM | 0.2-3 | 42 |
| 150 | SUR | 0.2-3 | 50 |
| 151 | DCM | 0.2-3 | 34 |
| 151 | SUR | 0.2-3 | 38 |
| 152 | DCM | 0.2-3 | 57 |
| 152 | MES | 0.2-3 | 4  |
| 152 | SUR | 0.2-3 | 56 |

**Table S5.** Number of sequences and OTUs for individual primer pairs.

| Name           | Raw     | High quality | With primers | Merged  | BLASTP validated | Pplacer validated | Singleton OTUs (97%) | Non-singleton OTUs (97%) |
|----------------|---------|--------------|--------------|---------|------------------|-------------------|----------------------|--------------------------|
| PP1            | 43,872  | 41,934       | 36,981       | 24,482  | 2,754            | 2,751             | 8                    | 48                       |
| PP2            | 322,013 | 321,254      | 315,500      | 310,568 | 303,992          | 303,898           | 309                  | 290                      |
| PP4            | 597,319 | 41,780       | 37,369       | 31,151  | 24,358           | 24,346            | 81                   | 233                      |
| PP5            | 70,359  | 70,266       | 68,285       | 59,566  | 49,132           | 46,085            | 112                  | 195                      |
| PP8            | 109,407 | 34,185       | 19,080       | 16,120  | 13,181           | 13,180            | 62                   | 161                      |
| PP9            | 538,706 | 17,708       | 13,152       | 10,991  | 9,124            | 9,097             | 64                   | 175                      |
| PP10           | 215,185 | 75,246       | 47,920       | 41,061  | 32,507           | 32,470            | 37                   | 145                      |
| PP12           | 261,662 | 195,848      | 112,926      | 98,109  | 92,781           | 92,512            | 267                  | 685                      |
| PP13           | 731,861 | 30,055       | 28,083       | 27,680  | 26,844           | 26,842            | 2                    | 2                        |
| PP14           | 98,336  | 71,647       | 64,726       | 58,511  | 52,768           | 52,322            | 40                   | 195                      |
| PP15           | 178,077 | 134,822      | 116,239      | 107,505 | 85,655           | 85,654            | 82                   | 204                      |
| PP16 26 cycles | 26,839  | 26,457       | 26,219       | 25,624  | 24,938           | 24,706            | 161                  | 566                      |
| PP16           | 148,545 | 147,810      | 146,433      | 139,153 | 133,588          | 132,792           | 495                  | 779                      |
| PP16 38 cycles | 321,645 | 316,612      | 313,377      | 305,423 | 295,745          | 293,415           | 345                  | 929                      |
| PP17           | 98,882  | 73,694       | 54,856       | 27,696  | 3,775            | 3,775             | 17                   | 99                       |
| PP18           | 185,579 | 184,370      | 182,867      | 176,711 | 169,404          | 169,281           | 317                  | 890                      |
| PP19           | 93,336  | 93,138       | 88,070       | 61,132  | 21,495           | 21,494            | 35                   | 173                      |
| PP20           | 304,295 | 27,039       | 17,928       | 11,889  | 5,281            | 5,281             | 54                   | 123                      |
| PP23           | 24,585  | 20,217       | 17,775       | 10,420  | 5,302            | 5,300             | 48                   | 122                      |
| PP24           | 82,131  | 80,884       | 78,916       | 48,197  | 41,200           | 40,392            | 983                  | 551                      |
| PP25           | 65,677  | 65,582       | 63,464       | 53,890  | 44,944           | 43,149            | 77                   | 299                      |
| PP26           | 173,125 | 149,688      | 141,845      | 133,441 | 124,780          | 124,754           | 217                  | 632                      |
| PP27           | 356,662 | 134,773      | 124,016      | 119,497 | 114,044          | 110,853           | 105                  | 361                      |
| PP29           | 372,344 | 353,711      | 327,753      | 313,388 | 285,086          | 284,986           | 173                  | 414                      |
| PP31           | 59,921  | 59,055       | 53,804       | 37,489  | 16,488           | 16,488            | 40                   | 223                      |
| PP33           | 493,259 | 416,575      | 151,951      | 139,666 | 118,349          | 118,325           | 102                  | 299                      |
| PP34           | 235,134 | 235,102      | 228,534      | 219,839 | 208,770          | 204,282           | 243                  | 431                      |
| PP35           | 532,470 | 528,309      | 523,716      | 512,130 | 480,637          | 480,545           | 454                  | 516                      |
| PP37           | 316,988 | 315,876      | 283,597      | 268,445 | 252,261          | 252,227           | 79                   | 123                      |
| PP38           | 192,334 | 191,155      | 187,275      | 174,145 | 154,464          | 152,682           | 191                  | 666                      |
| PP40           | 369,144 | 267,559      | 246,382      | 229,511 | 215,728          | 215,708           | 146                  | 611                      |

|                   |         |         |         |         |         |         |     |       |
|-------------------|---------|---------|---------|---------|---------|---------|-----|-------|
| PP41              | 678,171 | 13,430  | 6,947   | 5,195   | 3,290   | 3,224   | 21  | 84    |
| PP44              | 665,669 | 32,899  | 28,608  | 26,605  | 24,913  | 24,913  | 82  | 269   |
| PP45 26<br>cycles | 73,314  | 26,316  | 25,604  | 25,105  | 24,540  | 24,399  | 160 | 444   |
| PP45              | 297,664 | 272,454 | 268,975 | 262,928 | 256,846 | 256,248 | 407 | 615   |
| PP45 38<br>cycles | 409,219 | 334,953 | 328,313 | 316,745 | 309,040 | 307,426 | 575 | 781   |
| PP46              | 786,086 | 289,071 | 280,202 | 273,924 | 268,041 | 268,007 | 193 | 249   |
| PP48              | 379,717 | 379,532 | 368,541 | 358,829 | 345,130 | 344,656 | 127 | 142   |
| PP50              | 124,350 | 123,570 | 116,265 | 109,729 | 101,145 | 95,352  | 117 | 327   |
| PP51              | 586,019 | 148,681 | 139,755 | 135,437 | 130,944 | 130,770 | 81  | 216   |
| PP52              | 243,093 | 212,721 | 175,017 | 141,589 | 130,459 | 130,459 | 64  | 83    |
| PP53              | 63,638  | 59,240  | 53,975  | 43,463  | 29,427  | 29,143  | 80  | 334   |
| PP54              | 69,328  | 67,433  | 54,882  | 50,307  | 46,622  | 46,601  | 185 | 438   |
| PP55              | 449,690 | 448,173 | 415,028 | 397,463 | 380,952 | 380,874 | 429 | 585   |
| PP56              | 371,093 | 370,911 | 368,552 | 361,286 | 352,724 | 352,713 | 115 | 99    |
| PP59              | 89,181  | 88,411  | 81,889  | 73,473  | 64,786  | 64,781  | 79  | 198   |
| PP60              | 288,054 | 246,475 | 216,665 | 158,322 | 113,225 | 113,158 | 156 | 450   |
| PP61              | 207,927 | 198,608 | 194,626 | 170,486 | 100,622 | 100,621 | 103 | 155   |
| PP63              | 221,599 | 207,982 | 159,181 | 108,750 | 61,244  | 61,242  | 42  | 147   |
| PP64              | 289     | 264     | 0       | 0       | 0       | 0       | 0   | 0     |
| PP65              | 236,953 | 236,929 | 226,396 | 173,419 | 107,574 | 107,429 | 87  | 167   |
| PP66              | 245,644 | 245,457 | 243,349 | 239,937 | 234,839 | 234,836 | 193 | 513   |
| PP68              | 172,191 | 171,057 | 161,076 | 141,575 | 123,454 | 118,948 | 40  | 62    |
| PP69              | 563,995 | 560,072 | 542,589 | 531,260 | 517,549 | 517,425 | 536 | 840   |
| PP70              | 434,505 | 434,364 | 418,359 | 407,478 | 396,705 | 396,088 | 378 | 1,000 |
| PP71              | 379,063 | 378,541 | 367,173 | 354,991 | 328,867 | 328,545 | 467 | 931   |
| PP72              | 180,810 | 124,659 | 99,784  | 67,781  | 52,501  | 52,347  | 62  | 155   |
| PP73              | 358,612 | 345,758 | 339,850 | 331,234 | 322,674 | 322,661 | 442 | 181   |
| PP75              | 249,269 | 249,162 | 221,694 | 149,000 | 83,723  | 83,723  | 31  | 103   |
| PP77              | 82      | 79      | 0       | 0       | 0       | 0       | 0   | 0     |
| PP81              | 65,776  | 65,120  | 27,228  | 9,120   | 30      | 30      | 0   | 1     |
| PP82              | 166,802 | 163,086 | 162,136 | 158,609 | 154,284 | 154,275 | 149 | 261   |
